# Supplementary material for: Aging Mechanism of Mn-Based Prussian Blue Cathode Material by Synchrotron 2D X-ray Fluorescence
Source: MDPI journal article supplement (doi:10.3390/batteries10040123), 2024-04-05
Supplement: s1 [file s1]

# Supplementary information

## Aging Mechanism of Mn-based Prussian Blue Cathode Material by Synchrotron 2D X-ray Fluorescence

Mariam Maisuradze <sup>1</sup>, Min Li <sup>1</sup>, Ilaria Carlomagno <sup>2</sup>, Mattia Gaboardi <sup>2</sup>, Giuliana Aquilanti <sup>2</sup>, Jasper Rikkert Plaisier <sup>2</sup> and Marco Giorgetti <sup>1,\*</sup>

**Table S1.** The performance of MnHCF cathode material in AZIBs.

| Cathode material                             | Specific capacity                                 | Capacity retention                              | Ref. |
|----------------------------------------------|---------------------------------------------------|-------------------------------------------------|------|
| $K_{1.64}Mn_{1.2}Fe(CN)_6$                   | 65.5 mAh g <sup>-1</sup> at 25 mA g <sup>-1</sup> | 49% after 120 cycles at 200 mA g <sup>-1</sup>  | [1*] |
| $Na_2Mn[Fe(CN)_6] \cdot 2.78H_2O$            | 55.3 mAh g <sup>-1</sup> at 50 mA g <sup>-1</sup> | 60% after 120 cycles at 50 mA g <sup>-1</sup>   | [2*] |
| $K_{1.76}Mn_{1.17}[Fe(CN)_6] \cdot xH_2O$    | 123 mAh g <sup>-1</sup> at 50 mA g <sup>-1</sup>  | 90% after 500 cycles at 250 mA g <sup>-1</sup>  | [29] |
| $K_{1.6}Mn_{1.17}[Fe(CN)_6] \cdot xH_2O$     | 138 mAh g <sup>-1</sup> at 0.2 A g <sup>-1</sup>  | 72.5% after 400 cycles at 0.2 A g <sup>-1</sup> | [28] |
| $Na_{1.47}Mn[Fe(CN)_6]_{0.88} \cdot 2.6H_2O$ | 176 mAh g <sup>-1</sup> at C/20                   | 70% after 50 cycles at C/5                      | [39] |
| $Na_2MnFe(CN)_6$                             | 137 mAh g <sup>-1</sup> at 0.5 C                  | 90% after 400 cycles at 0.5 C                   | [3*] |

1\* Li, Q.; Ma, K.; Yang, G.; Wang, C. High-voltage non-aqueous Zn/ $K_{1.6}Mn_{1.2}Fe(CN)_6$  batteries with zero capacity loss in extremely long working duration. *Energy Storage Mater*, **2020**, 29, 246–253. DOI: 10.1016/j.ensm.2020.04.030.

2\* Li, W.; Xu, C.; Zhang, X.; Xia, M.; Yang, Z.; Yan, H.; Yu, H.; Zhang, L.; Shu, W.; Shu, J. Sodium manganese hexacyanoferrate as Zn ion host toward aqueous energy storage. *J. Electroanal. Chem.*, **2021**, 881, 114968. DOI: 10.1016/j.jelechem.2020.114968.

3\* Hou, Z.; Zhang, X.; Li, X.; Zhu, Y.; Liang, J.; Qian, Y. Surfactant widens the electrochemical window of an aqueous electrolyte for better rechargeable aqueous sodium/zinc battery. *J Mater Chem A Mater*, **2017**, 5 (2), 730–738. DOI: 10.1039/C6TA08736A.

**Table S2.** The list of samples analyzed with PXRD technique.

| 30%NiMnHCF Samples | Description                              |
|--------------------|------------------------------------------|
| Pristine           | Fresh electrode                          |
| C1                 | Charged after 1 <sup>st</sup> cycle      |
| D1                 | Discharged after 1 <sup>st</sup> cycle   |
| C2                 | Charged after 2 <sup>nd</sup> cycle      |
| D2                 | Discharged after 2 <sup>nd</sup> cycle   |
| C10                | Charged after 10 <sup>th</sup> cycle     |
| D10                | Discharged after 10 <sup>th</sup> cycle  |
| C50                | Charged after 50 <sup>th</sup> cycle     |
| D50                | Discharged after 50 <sup>th</sup> cycle  |
| C100               | Charged after 100 <sup>th</sup> cycle    |
| D100               | Discharged after 100 <sup>th</sup> cycle |

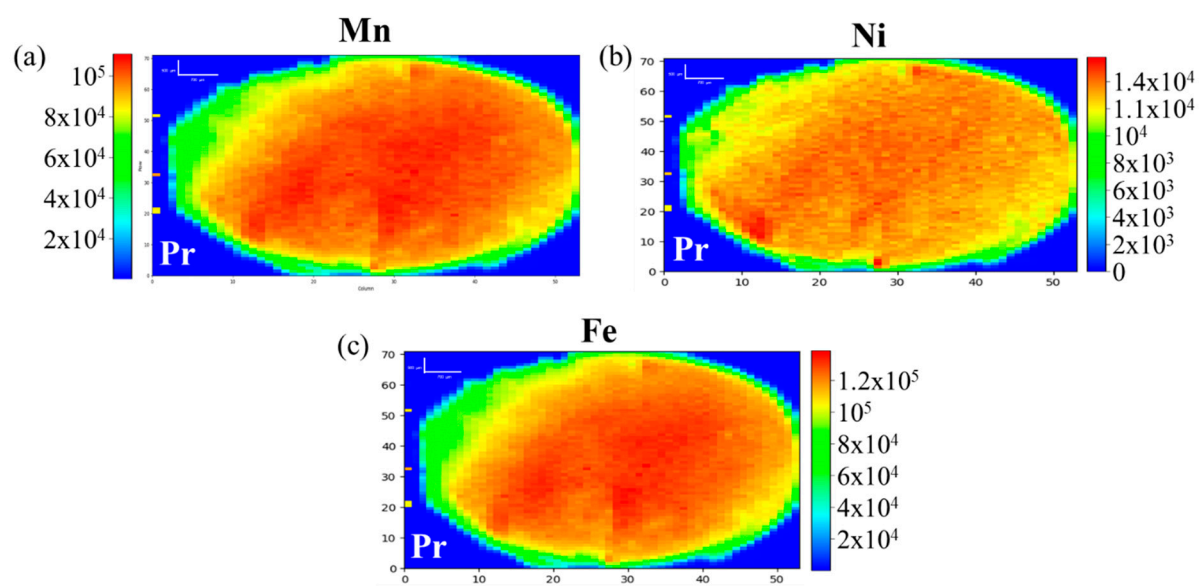

**Figure S1.** 2D-XRF maps of Pristine sample of 10%NiMnHCF: (a) Mn, (b) Ni and (c) Fe.

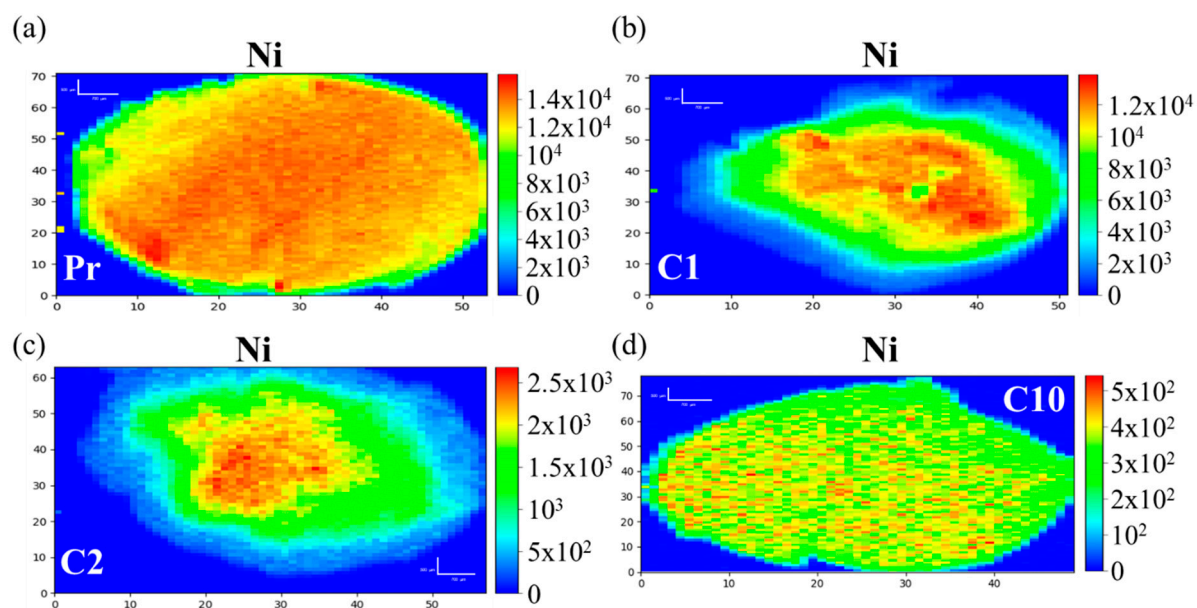

**Figure S2.** 2D-XRF maps of Ni contribution of 10%NiMnHCF samples: (a) Pristine, (b), C1, (c) C2 and (d) C10.

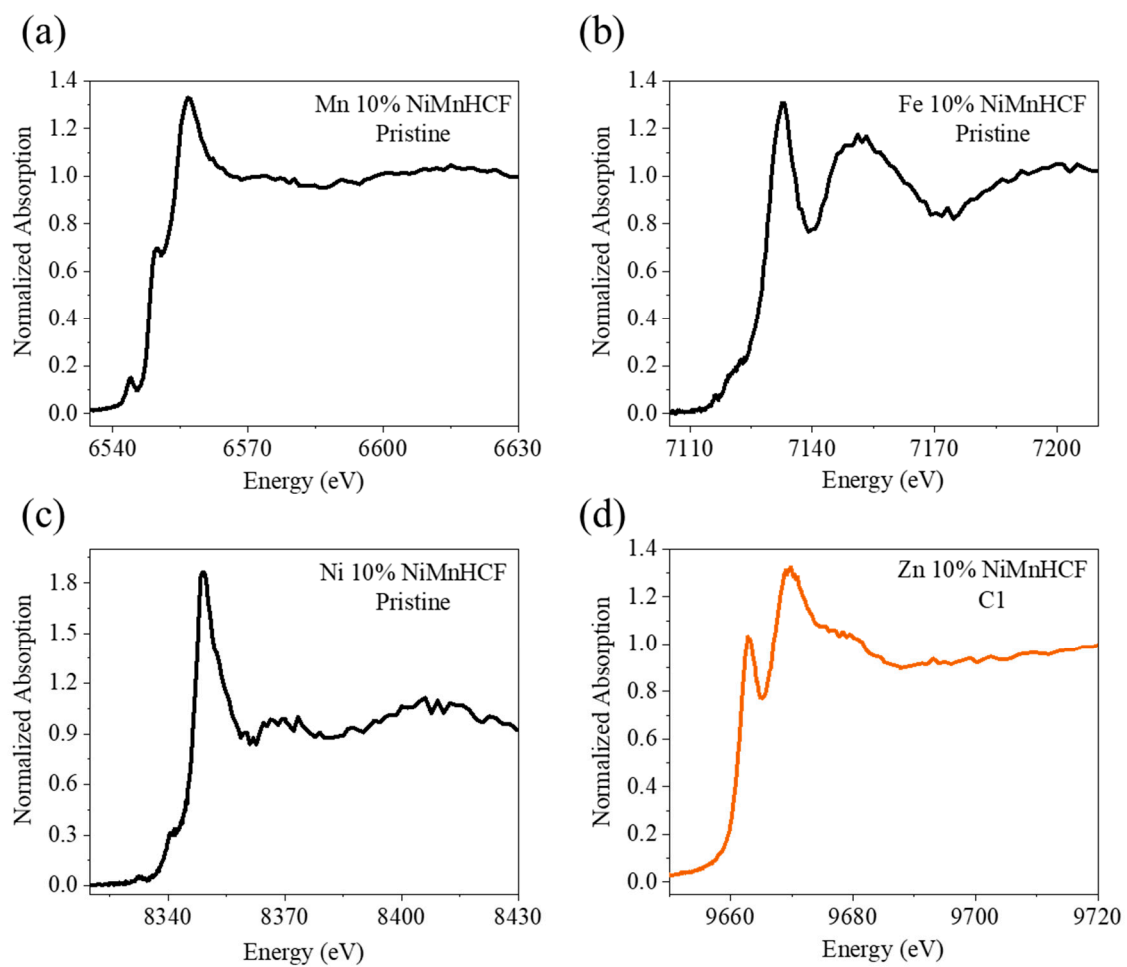

**Figure S3.** XANES of 10%NiMnHCF samples: (a) Mn K-edge of Pristine, (b), Fe K-edge of Pristine, (c) Ni K-edge of Pristine and (d) Zn K-edge of C1.

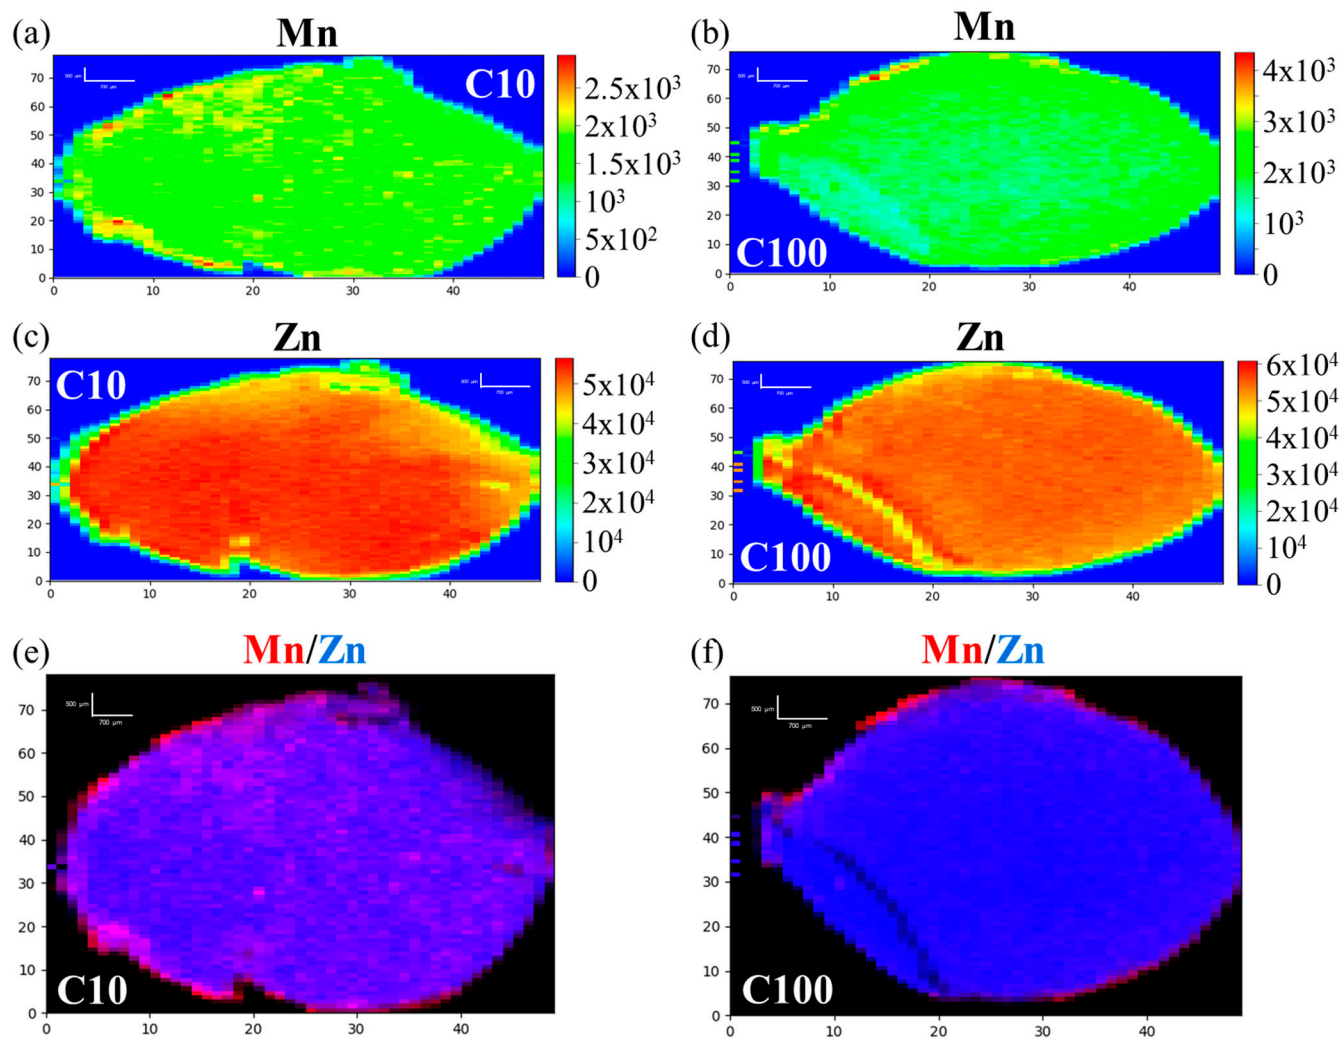

**Figure S4.** 2D-XRF maps of 10%NiMnHCF samples: (a) C10 Mn, (b), C100 Mn, (c) C10 Zn, (d) C100 Zn, (e) C10 Mn/Zn overlay and (f) C100 Mn/Zn overlay.

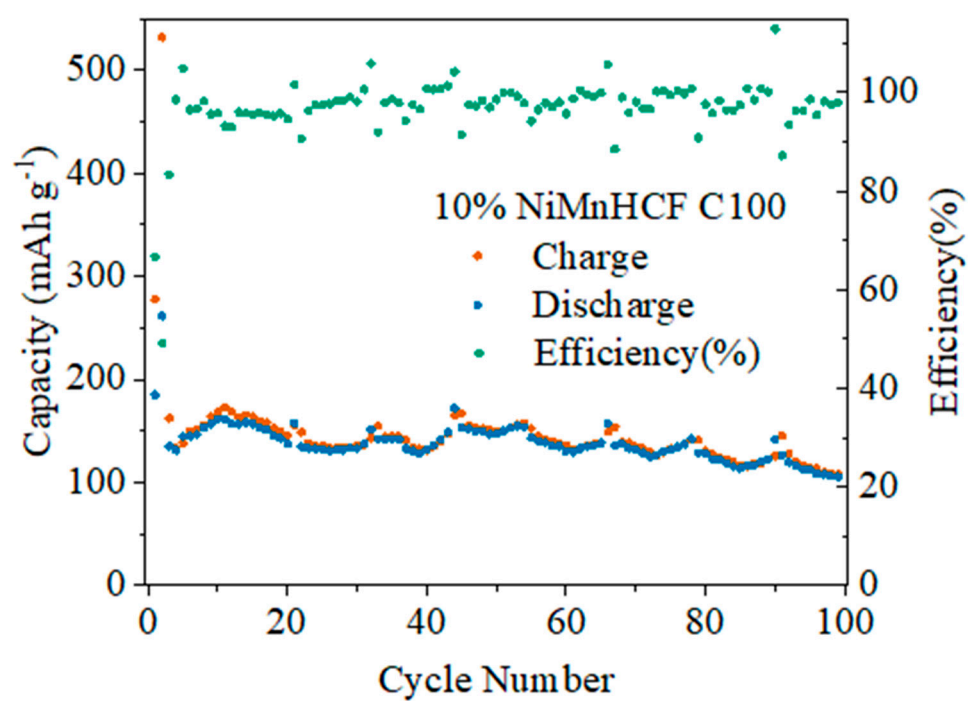

**Figure S5.** GCPL data of C100 of 10%NiMnHCF: stability and efficiency test.

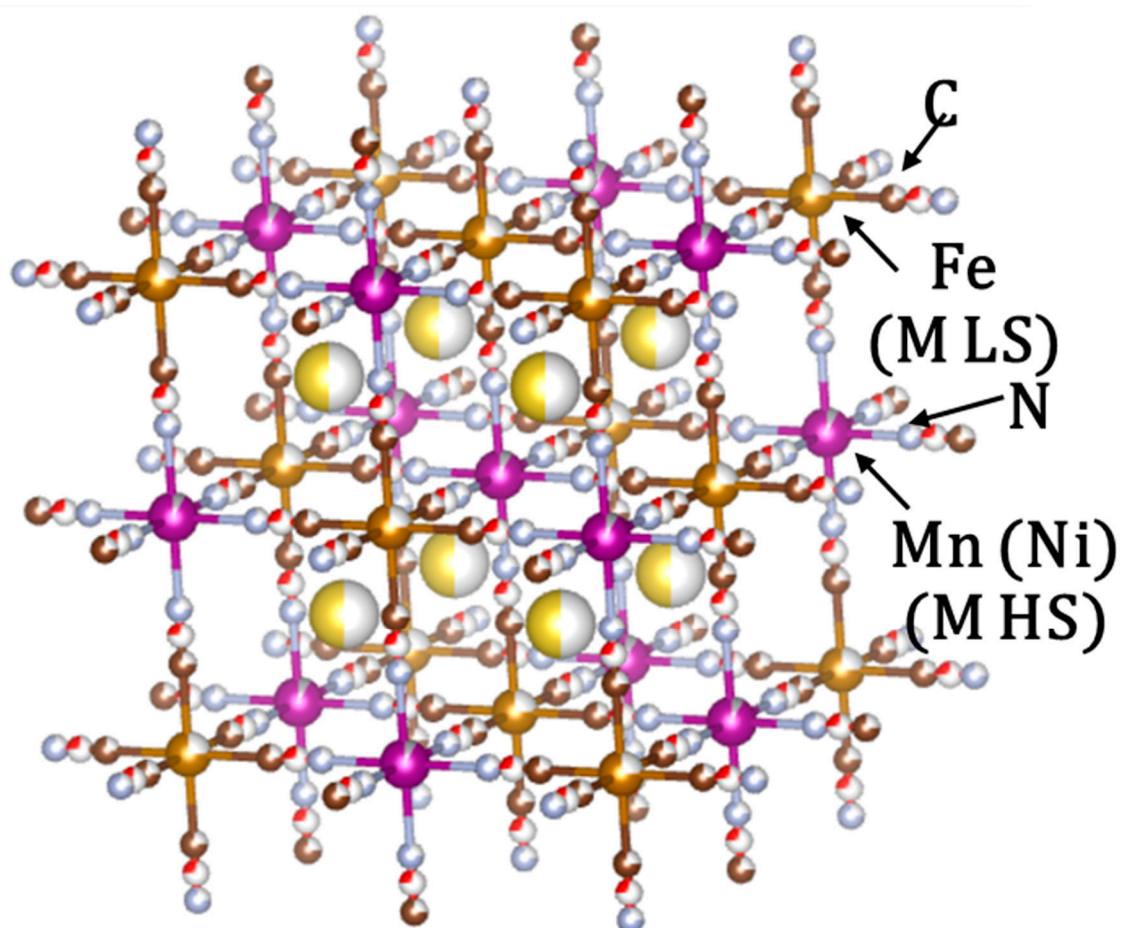

**Figure S6.**  $Fm\bar{3}m$  structure of 30%NiMnHCF.



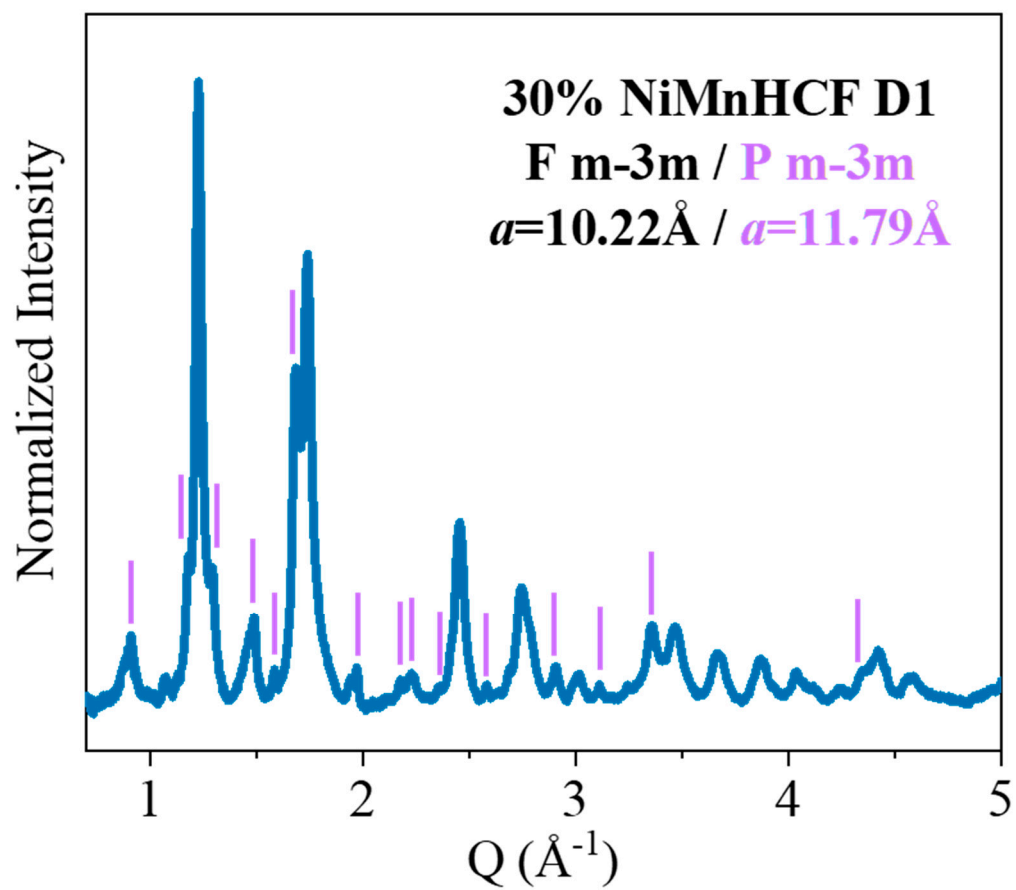

**Figure S7.** PXRD measurement result of D1 of 30%NiMnHCF.

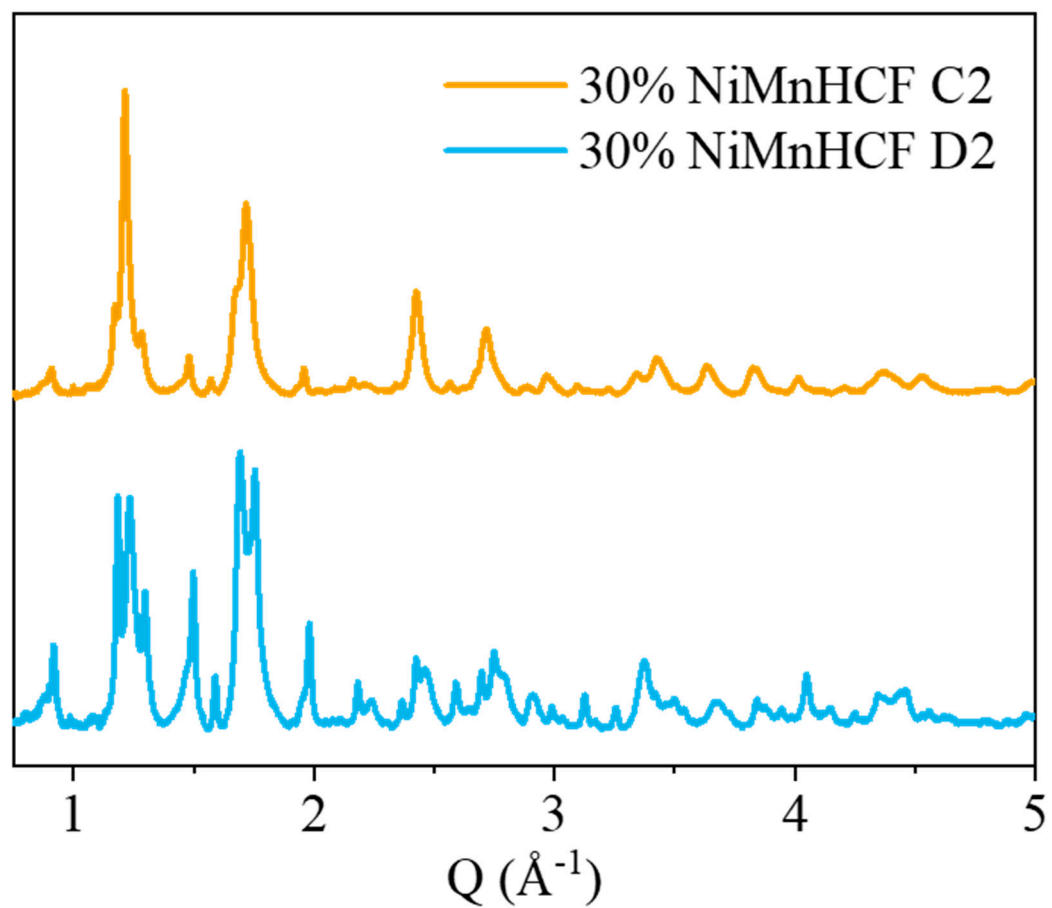

**Figure S8.** PXRD measurement results of C2 and D2 of 30%NiMnHCF.

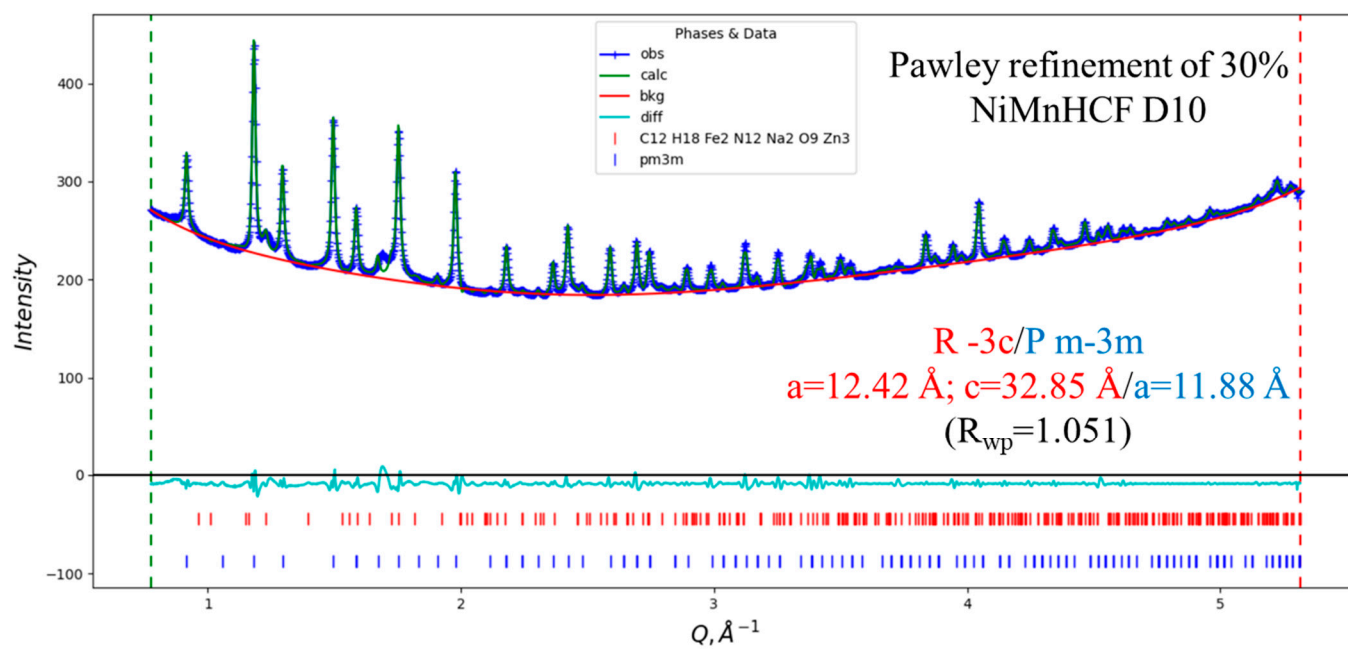

**Figure S9.** Pawley refinement of D10 of 30%NiMnHCF.

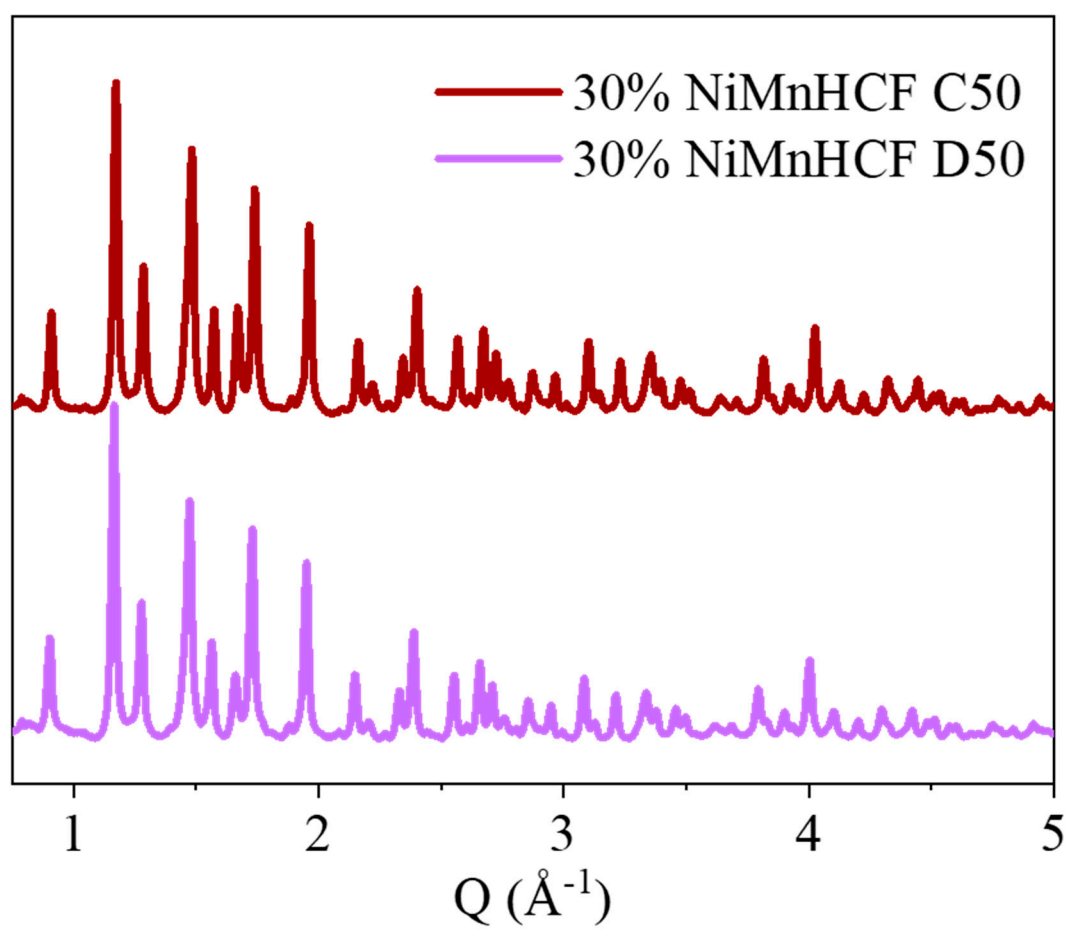

**Figure S10.** PXRD measurement results of C50 and D50 of 30%NiMnHCF.

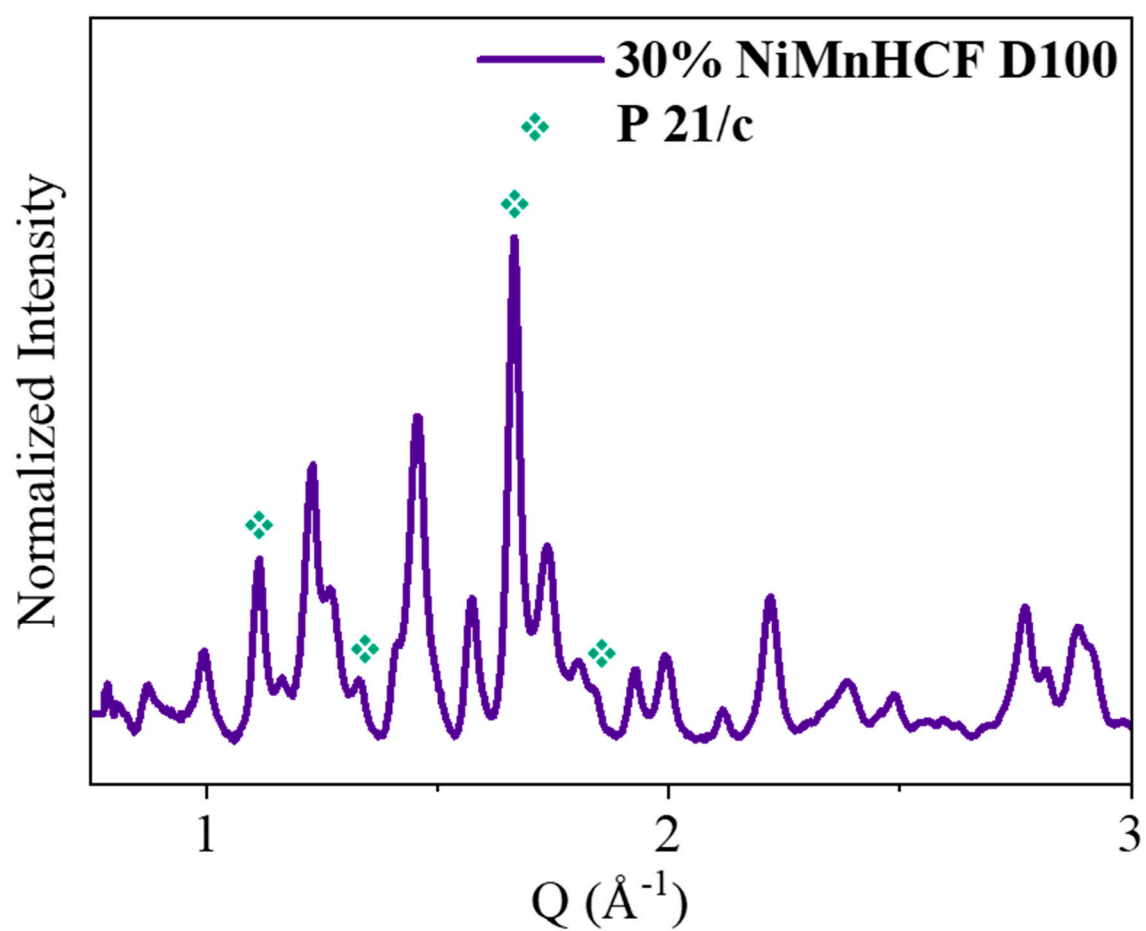

**Figure S11.** PXRD measurement result of D100 of 30%NiMnHCF.

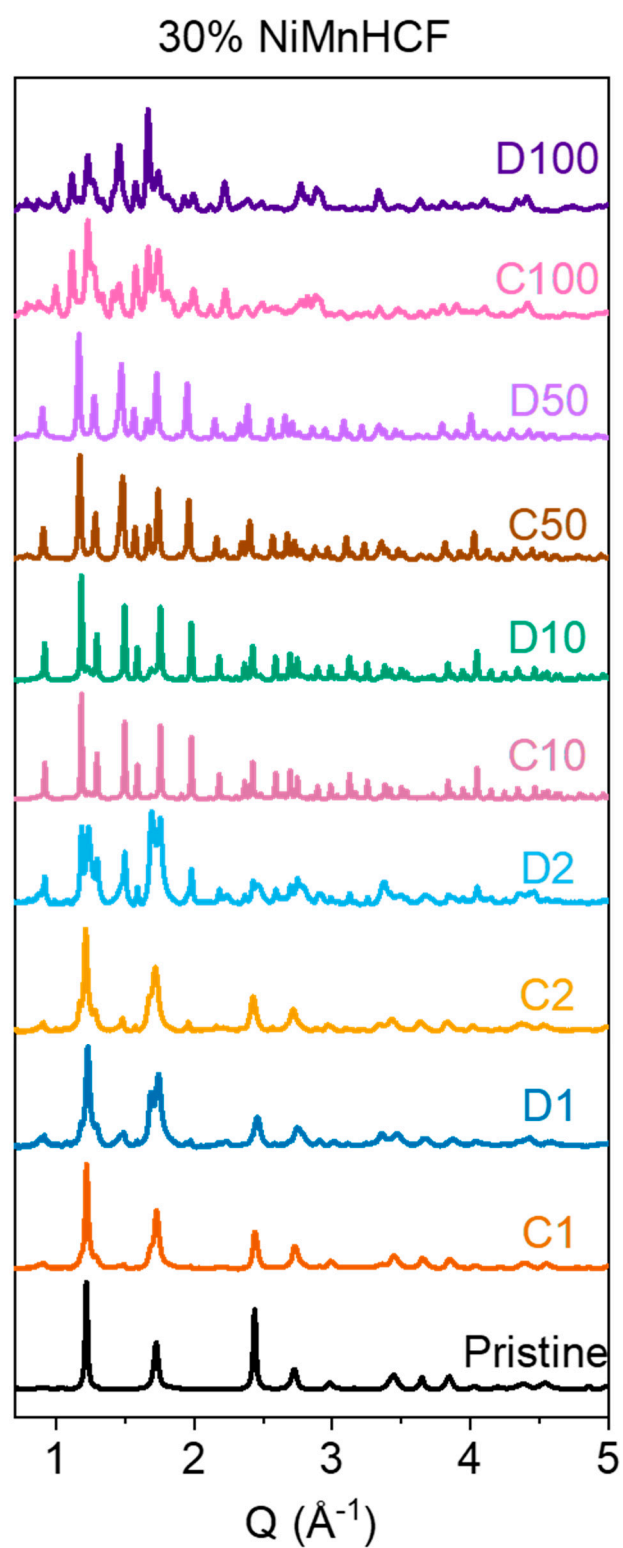

**Figure S12.** PXRD measurement result of D100 of 30%NiMnHCF.

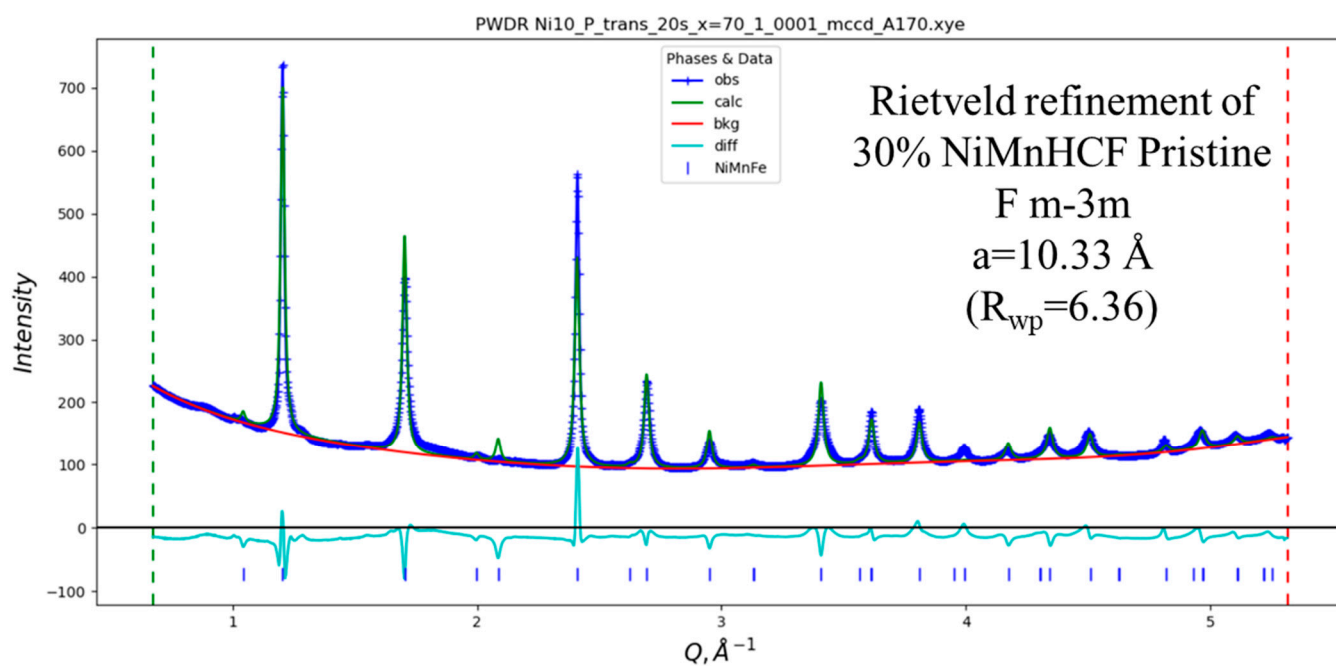

**Figure S13.** Rietveld refinement of Pristine of 30%NiMnHCF.

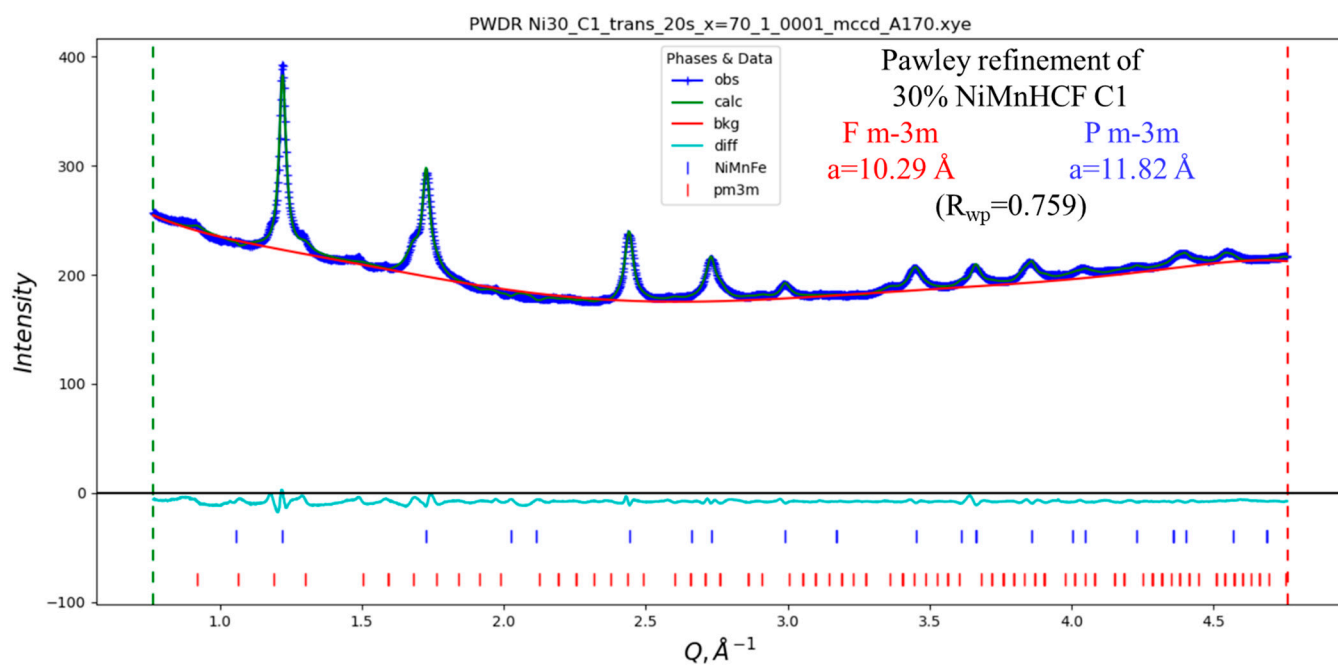

**Figure S14.** Pawley refinement of C1 of 30%NiMnHCF.



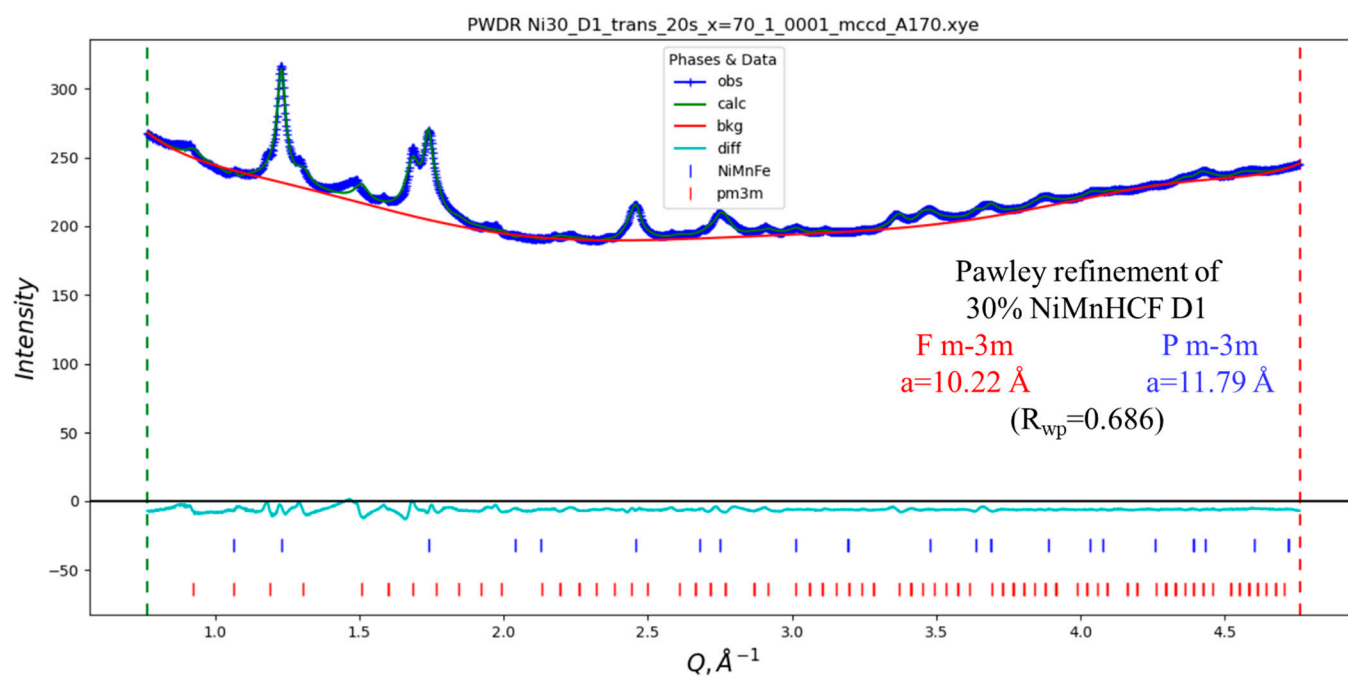

**Figure S15.** Pawley refinement of D1 of 30%NiMnHCF.

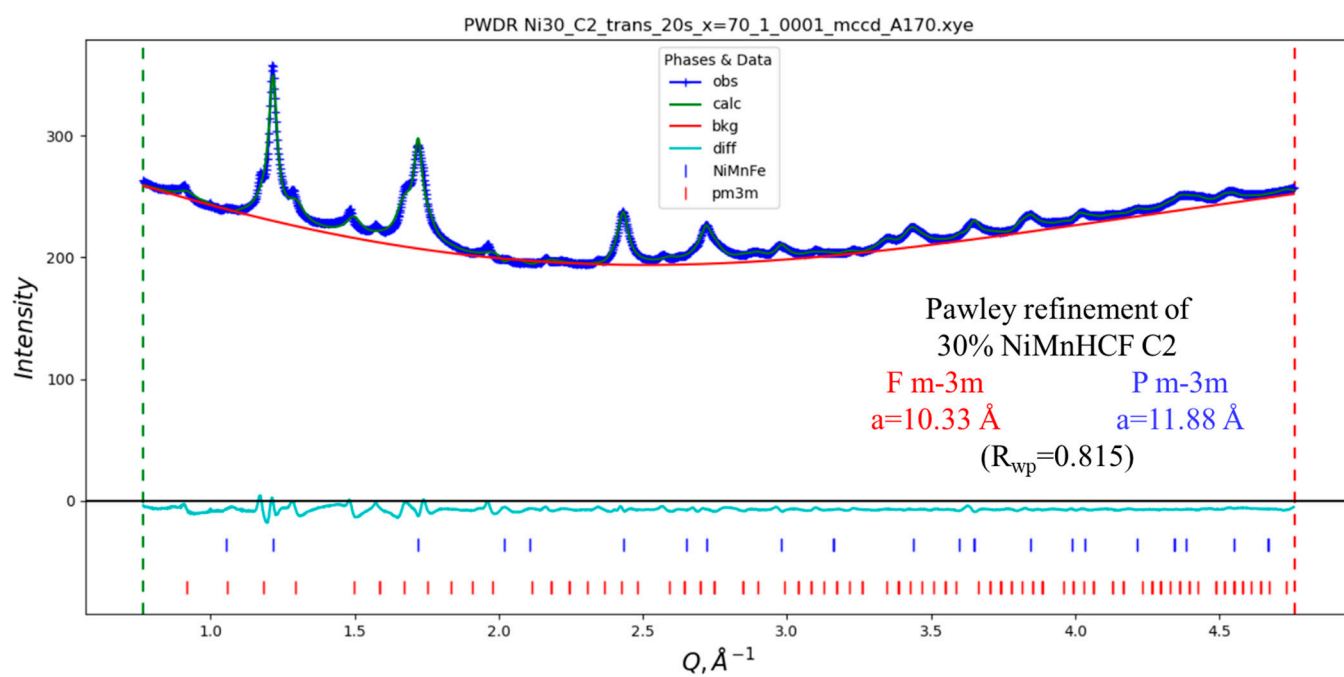

**Figure S16.** Pawley refinement of C2 of 30%NiMnHCF.

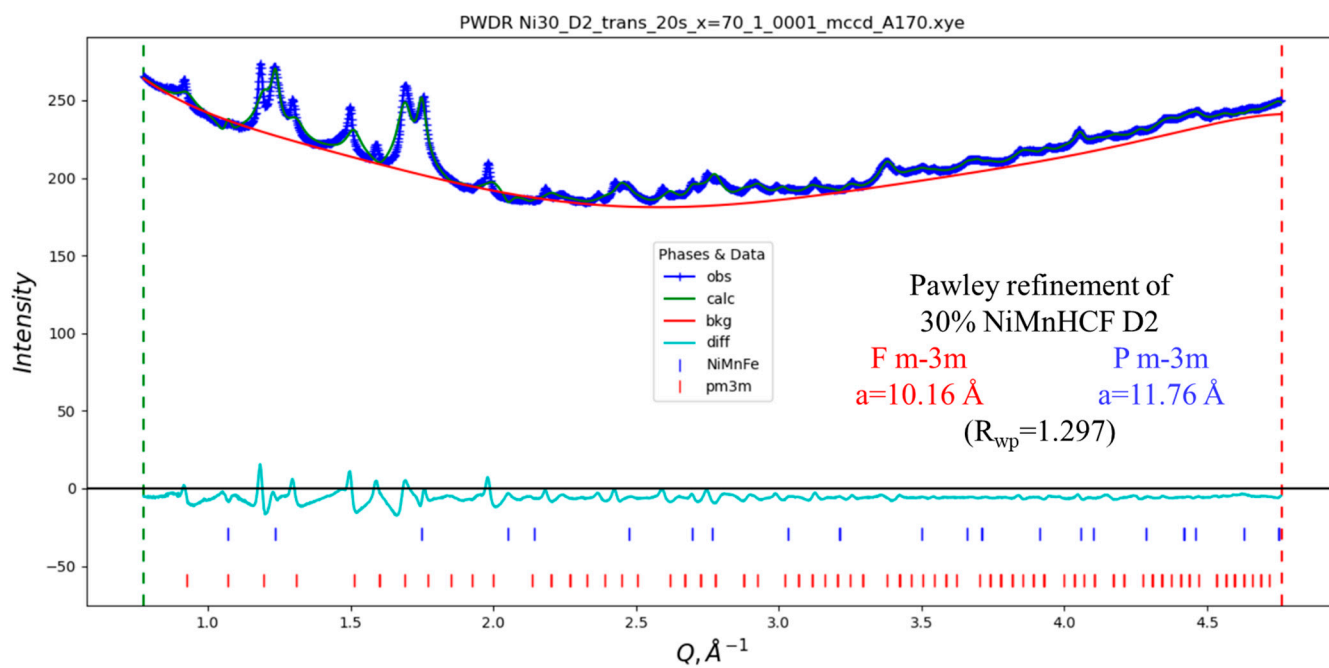

**Figure S17.** Pawley refinement of D2 of 30%NiMnHCF.

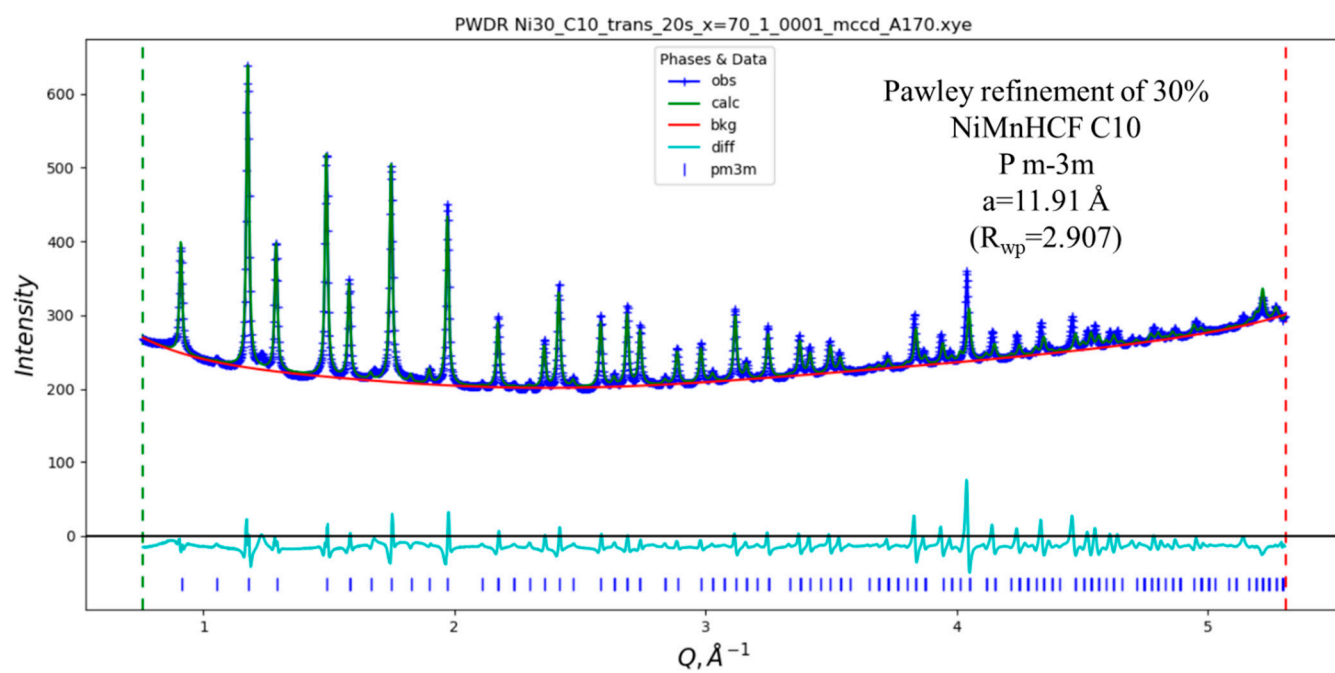

**Figure S18.** Pawley refinement of C10 of 30%NiMnHCF.

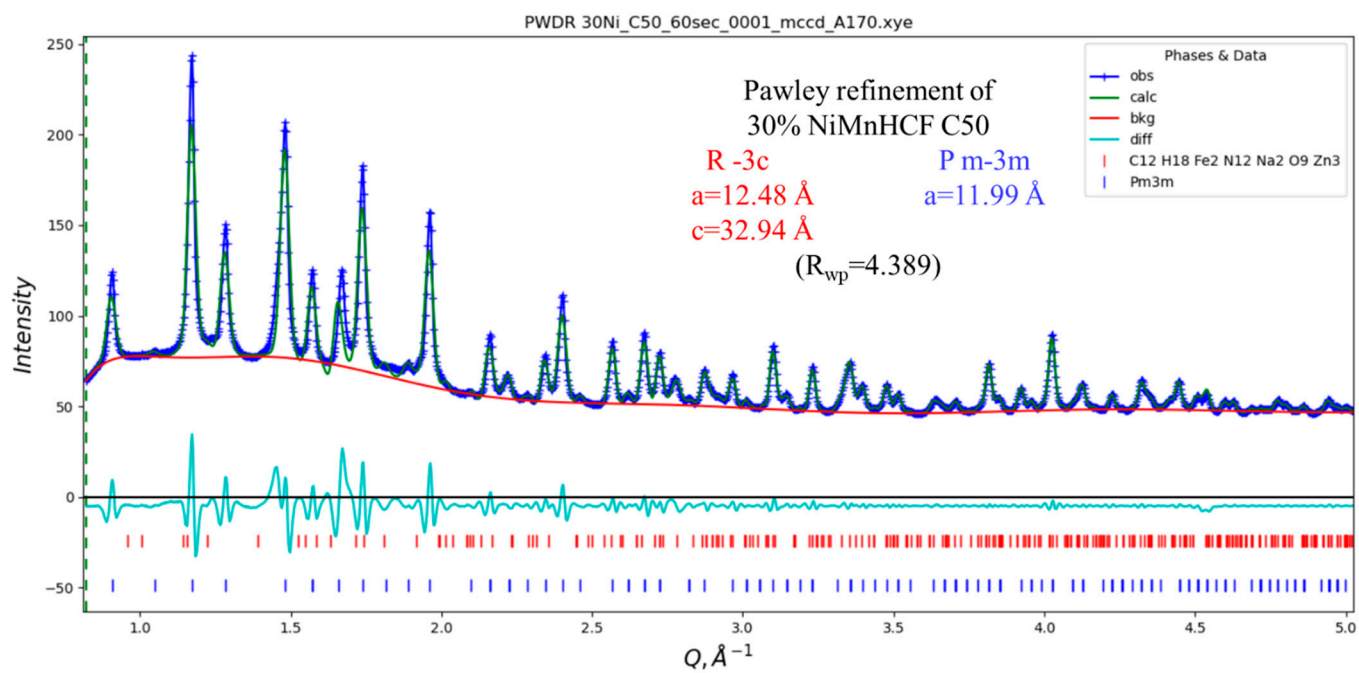

**Figure S19.** Pawley refinement of C50 of 30%NiMnHCF.

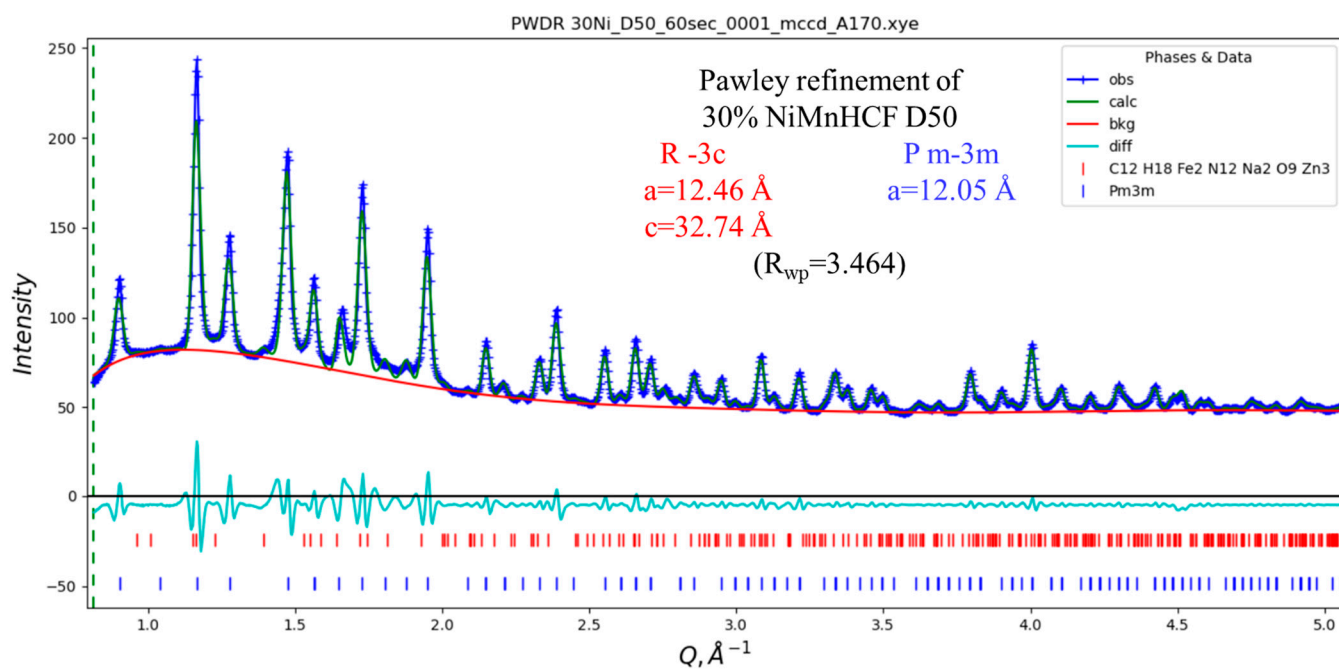

**Figure S20.** Pawley refinement of D50 of 30%NiMnHCF.

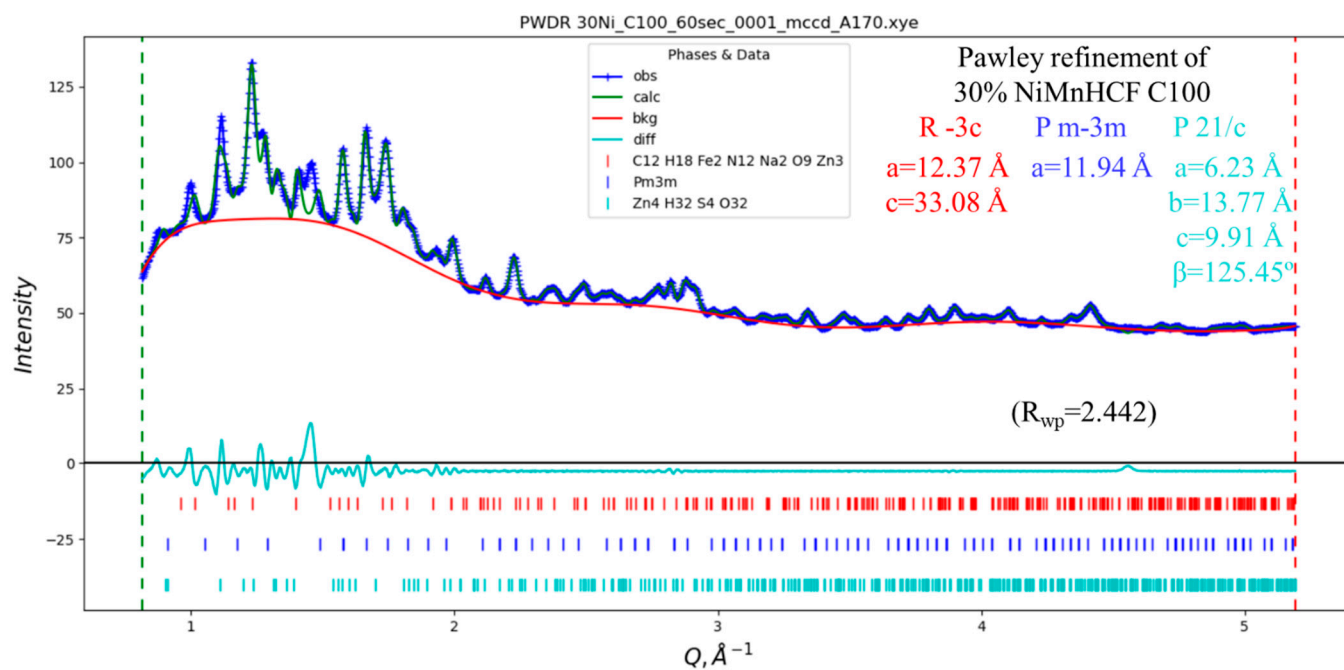

**Figure S21.** Pawley refinement of C100 of 30%NiMnHCF.

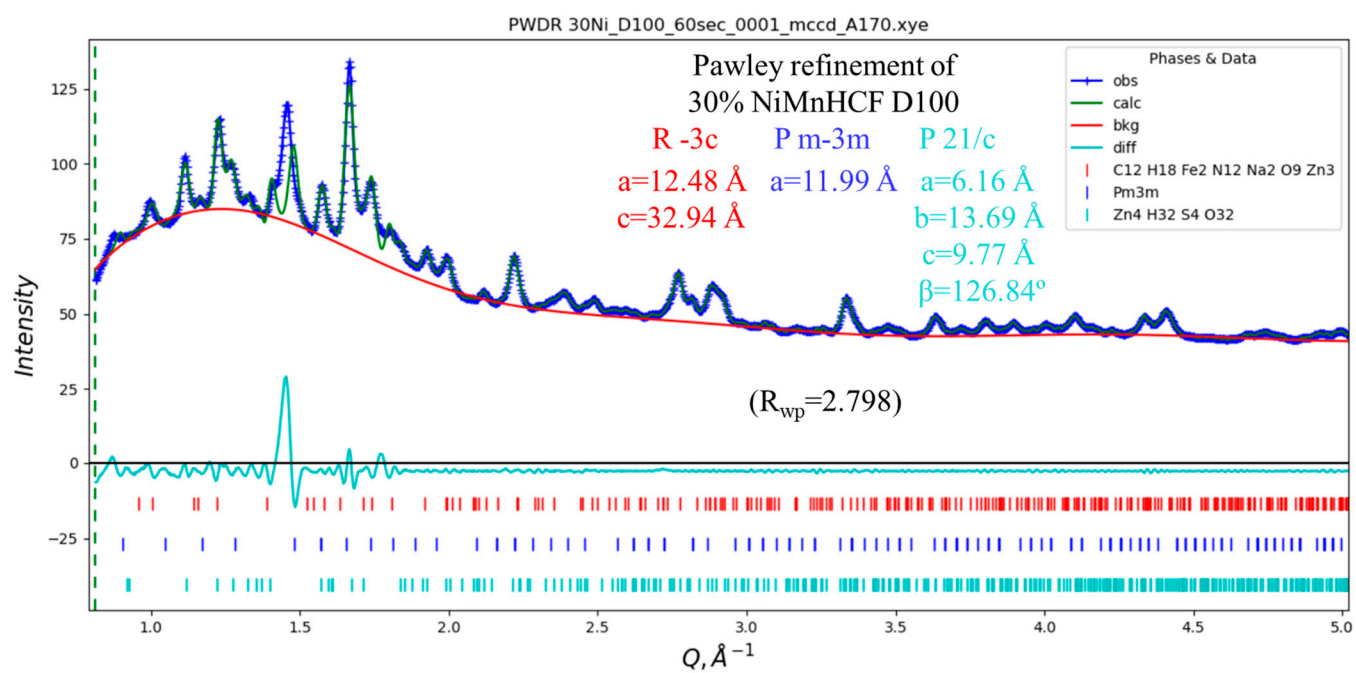

Figure S22. Pawley refinement of D100 of 30%NiMnHCF.
